# Supplementary material for: Pseudo-ginsengenin DQ ameliorated aconitine-induced arrhythmias by influencing Ca2+ and K+ currents in ventricular myocytes
Source: RSC Adv. 2020 Jul 9;10(43):25999–6005. doi: 10.1039/d0ra01683g (PMC9055354; doi:10.1039/d0ra01683g)
Supplement: RA-010-D0RA01683G-s001 [file RA-010-D0RA01683G-s001.xlsx]

## Sheet: Fig-3
CACON1		CACON2		CACON3		CACON4		CACON5		CACON6
OUT #0 at Cursor 1	amplitude Negative Peak	OUT #0 at Cursor 1	amplitude Negative Peak	OUT #0 at Cursor 1	amplitude Negative Peak	OUT #0 at Cursor 1	amplitude Negative Peak	OUT #0 at Cursor 1	amplitude Negative Peak	OUT #0 at Cursor 1	amplitude		average±SD		average	SD
-50	0.00973605		0.00365465		0.00919766		0		-0.0165418		0.00649333		0.02±0.11		0.0234829	0.11
-40	0.0114188		0.0015326		0.0136432		0.00128424		-0.030341		-0.000227836		-0.01±0.18		-0.00503745	0.18
-30	0		-0.00341887		0		-0.00689432		-0.0263984		-0.00706292		-0.08±0.11		-0.0819747	0.11
-20	-0.0211549		-0.0206311		-0.0282061		-0.0510315		-0.0658245		-0.0387321		-0.42±0.2		-0.422435	0.2
-10	-0.138348		-0.116477		-0.180887		-0.174453		-0.222929		-0.161194		-1.86±0.41		-1.86196	0.41
0	-0.28523		-0.241443		-0.343226		-0.284492		-0.351835		-0.282859		-3.34±0.47		-3.35035	0.47
10	-0.319126		-0.291193		-0.381703		-0.307541		-0.336751		-0.313502		-3.64±0.35		-3.65134	0.35
20	-0.269364		-0.23767		-0.319619		-0.247046		-0.262355		-0.250961		-2.96±0.33		-2.97194	0.33
30	-0.191836		-0.153377		-0.228715		-0.169992		-0.178275		-0.164953		-2.03±0.3		-2.03586	0.3
40	-0.118636		-0.0765119		-0.147469		-0.0902345		-0.066853		-0.0790591		-1.08±0.34		-1.08383	0.34
50	-0.0510842		-0.0226353		-0.0519668		-0.0145997		0.00239985		-0.0213027		-0.3±0.24		-0.298106	0.24
60	0.00961585		0.0341887		0.0136432		0.062522		0.0340265		0.0411244		0.36±0.22		0.365394	0.22
CA21		CA22		CA23		CA24		CA25		CA26
OUT #0 at Cursor 1	amplitude Negative Peak	OUT #0 at Cursor 1	amplitude Negative Peak	OUT #0 at Cursor 1	amplitude Negative Peak	OUT #0 at Cursor 1	amplitude Negative Peak	OUT #0 at Cursor 1	amplitude Negative Peak	OUT #0 at Cursor 1	amplitude		average±SD	P value	average
-50	0.0102853		0.00633243		0.0143749		0.00613229		-0.0357316		0		0±0.2	0.830673	-0.019982	0.21
-40	0.00624932		0.0042647		0.0134475		-0.218846		0		0.00330826		-0.36±1.03	0.426466	-0.444552	1.03
-30	-0.00624932		-0.0042647		-0.00289817		-0.203515		-0.0117704		-0.00650625		-0.44±0.9	0.35827	-0.514505	0.91
-20	-0.0278616		-0.0230035		-0.0217942		-0.189526		-0.0670192		-0.0438896		-0.7±0.72	0.390866	-0.775803	0.73
-10	-0.126939		-0.10106		-0.147227		-0.183585		-0.206582		-0.166295		-1.74±0.43	0.641114	-1.80842	0.43
0	-0.275751		-0.221506		-0.334448		-0.238009		-0.352872		-0.282195		-3.18±0.58	0.615917	-3.2113	0.58
10	-0.310383		-0.291938		-0.376182		-0.307189		-0.345665		-0.320681		-3.64±0.34	0.983937	-3.68911	0.34
20	-0.262732		-0.253556		-0.320421		-0.277103		-0.278166		-0.27238		-3.11±0.26	0.41635	-3.14972	0.26
30	-0.178366		-0.167615		-0.22826		-0.187418		-0.190608		-0.181955		-2.12±0.23	0.582099	-2.14799	0.23
40	-0.102984		-0.0894294		-0.1383		-0.12667		-0.111038		-0.102556		-1.25±0.2	0.313734	-1.27639	0.2
50	-0.0363242		-0.0162834		-0.0680489		-0.102333		-0.0276844		-0.0275689		-0.52±0.36	0.240423	-0.543637	0.37
60	0.00403602		0.0357976		0.00881042		-0.104824		0.0157339		0.034406		-0.01±0.59	0.172854	-0.0226429	0.59
CA201		CA202				CA204		CA205		CA206
OUT #0 at Cursor 1	amplitude Negative Peak	OUT #0 at Cursor 1	amplitude Negative Peak	OUT #0 at Cursor 1	amplitude Negative Peak	OUT #0 at Cursor 1	amplitude Negative Peak	OUT #0 at Cursor 1	amplitude Negative Peak	OUT #0 at Cursor 1	amplitude		average±SD	P value	average
-50	0.00782407		0		0.0045627		-0.00202505		-0.00383829		0.00573765		0.02±0.05	0.991853	0.0229608	0.05
-40	0.00569023		0		0.00381994		-0.00517513		-0.00383829		-0.0844254		-0.16±0.39	0.405195	-0.15717	0.39
-30	-0.00142256		-0.00261031		-0.00848875		-0.00438761		-0.00775183		-0.0483602		-0.14±0.2	0.572777	-0.136744	0.2
-20	-0.0285934		-0.0191423		-0.0305595		-0.0275632		-0.0474141		-0.0306789		-0.34±0.1	0.42114	-0.344478	0.1
-10	-0.139837		-0.08353		-0.102289		-0.0718893		-0.18642		-0.107493		-1.29±0.47	0.0510118	-1.29487	0.47
0	-0.267441		-0.204366		-0.200334		-0.18608		-0.31346		-0.219436		-2.6±0.55	0.0299404	-2.60509	0.55
10	-0.298879		-0.276802		-0.225482		-0.268094		-0.277711		-0.277515		-3.03±0.27	0.00759654	-3.0421	0.27
20	-0.250655		-0.246131		-0.18983		-0.227256		-0.210278		-0.246836		-2.56±0.27	0.0429546	-2.56739	0.27
30	-0.170991		-0.160317		-0.121601		-0.154466		-0.130803		-0.16768		-1.69±0.23	0.0512905	-1.69636	0.23
40	-0.100006		-0.0779831		-0.0638778		-0.0585015		-0.0593806		-0.0868844		-0.83±0.19	0.154239	-0.836392	0.19
50	-0.0307272		-0.0127253		-0.0134759		0.0126003		-0.00775183		-0.0230677		-0.14±0.17	0.215699	-0.140726	0.17
60	0.00569023		0.00261031		0.025254		0.0358884		0.00775183		0.0225993		0.19±0.15	0.127161	0.18688	0.15
CA2001		CA2002		CA2003		CA2004		CA2005		CA2006
OUT #0 at Cursor 1	amplitude Negative Peak	OUT #0 at Cursor 1	amplitude Negative Peak	OUT #0 at Cursor 1	amplitude Negative Peak	OUT #0 at Cursor 1	amplitude Negative Peak	OUT #0 at Cursor 1	amplitude Negative Peak	OUT #0 at Cursor 1	amplitude		average±SD	P value	average
-50	0.00726767		0.0104208		0.00639949		0.000469279		0.00289955		0.00538695		0.06±0.04	0.444668	0.0615051	0.04
-40	0.00726767		0.00181231		0.00306454		-0.00910401		0		0.00140889		0.01±0.06	0.864574	0.00833221	0.06
-30	-0.00150366		-0.00203885		-0.00549815		-0.0193343		-0.0255886		-0.00513832		-0.11±0.11	0.666963	-0.110678	0.11
-20	-0.0225548		-0.0191425		-0.0224433		-0.0439245		-0.0776356		-0.0300012		-0.4±0.25	0.890878	-0.403936	0.25
-10	-0.126934		-0.0843857		-0.0936489		-0.125954		-0.191443		-0.135668		-1.41±0.42	0.0975879	-1.41954	0.43
0	-0.24873		-0.193464		-0.194418		-0.2444		-0.308368		-0.239429		-2.67±0.47	0.0330257	-2.67567	0.48
10	-0.280056		-0.269694		-0.219205		-0.265893		-0.253059		-0.27059		-2.91±0.24	0.00190443	-2.91853	0.24
20	-0.239081		-0.258594		-0.191624		-0.190715		-0.197895		-0.230396		-2.44±0.32	0.019387	-2.45001	0.32
30	-0.165653		-0.184516		-0.127359		-0.102772		-0.129538		-0.155476		-1.61±0.33	0.0467098	-1.62044	0.33
40	-0.0979883		-0.0953728		-0.0671496		-0.016237		-0.0677771		-0.082296		-0.8±0.33	0.178407	-0.79929	0.34
50	-0.0342082		-0.0236733		-0.0264092		0.0470217		-0.0191371		-0.0236197		-0.15±0.34	0.400316	-0.149861	0.34
60	0.013157		0.0104208		0.0133398		0.0769617		0.0191371		0.0348908		0.31±0.29	0.73584	0.314433	0.29
