# Supplementary material for: Pseudo-ginsengenin DQ ameliorated aconitine-induced arrhythmias by influencing Ca2+ and K+ currents in ventricular myocytes
Source: RSC Adv. 2020 Jul 9;10(43):25999–6005. doi: 10.1039/d0ra01683g (PMC9055354; doi:10.1039/d0ra01683g)
Supplement: RA-010-D0RA01683G-s002 [file RA-010-D0RA01683G-s002.xlsx]

## Sheet: Fig-4
IKC01		IKC02	IKC03	IKC04	IKC05	IKC06
OUT #0 at Cursor 1	amplitude Positive Peak	amplitude Positive Peak	amplitude Positive Peak	amplitude Positive Peak	amplitude Positive Peak	amplitude Positive Peak			average±SD	average		SD
-50	-0.0784991	0.018166	-0.120583	-0.120153	-0.0561203	-0.0557388			-0.77±0.58	-0.773274		0.58
-40	0.0160358	-0.0580841	-0.154741	-0.156544	-0.156042	-0.0782389			-1.1±0.79	-1.1004		0.79
-30	0.0100797	0.0580841	-0.215238	-0.199523	-0.422956	-0.148552			-1.72±1.95	-1.7193		1.95
-20	0.073612	0.174441	-0.142806	-0.156544	-0.422956	-0.128353			-1.13±2.33	-1.12848		2.33
-10	0.200677	0.290987	-0.0477393	-0.056155	-0.265203	-0.0485797			0.14±2.26	0.138552		2.26
0	0.344694	0.439665	0.0958901	0.113251	-0.109161	0.0485797			1.75±2.27	1.74704		2.27
10	0.552243	0.601413	0.239931	0.299284	0.171441	0.187927			3.84±2.11	3.84314		2.11
20	0.73108	0.808506	0.431711	0.52861	0.406872	0.408581			6.21±1.98	6.20854		1.98
30	0.926717	1.0155	0.647773	0.827267	0.721009	0.658127			8.98±1.69	8.98201		1.69
40	1.24423	1.26129	0.995529	1.12875	1.09743	0.96827			12.54±1.37	12.5384		1.37
50	1.70529	1.54609	1.319	1.47258	1.56966	1.28813			16.67±1.78	16.6681		1.78
IKX01		IKX02	IKX03	IKX04	IKX05	IKX06
OUT #0 at Cursor 1	amplitude Positive Peak	amplitude Positive Peak	amplitude Positive Peak	amplitude Positive Peak	amplitude Positive Peak	amplitude Positive Peak			average±SD	average	P value
-50	-0.136368	-0.124717	-0.0676974	-0.148341	-0.160125	-0.142917			-1.46±0.37	-1.46098	0.0340461	0.37
-40	-0.112341	-0.134874	-0.0811727	-0.15824	-0.157931	-0.166072			-1.52±0.37	-1.51804	0.270377	0.37
-30	-0.124841	-0.177675	-0.109728	-0.202785	-0.128045	-0.177525			-1.72±0.42	-1.72397	0.99553	0.42
-20	-0.129712	-0.0804413	-0.131384	-0.0821602	-0.105424	-0.1164			-1.21±0.25	-1.20884	0.934804	0.25
-10	-0.0324685	0.0309642	-0.0150795	0.0110301	-0.0818445	-0.0451905			-0.25±0.45	-0.248293	0.68961	0.45
0	0.167213	0.139216	0.103311	0.135048	0.144085	0.116524			1.51±0.25	1.50823	0.802702	0.25
10	0.362348	0.324796	0.241272	0.364842	0.379199	0.266163			3.63±0.64	3.63037	0.818098	0.64
20	0.531347	0.562556	0.470673	0.552072	0.569484	0.486389			5.94±0.46	5.94105	0.753392	0.46
30	0.73395	0.855897	0.786862	0.782856	0.804598	0.774836			8.87±0.45	8.87453	0.883159	0.45
40	1.06691	1.093	1.01289	1.07388	1.03135	1.09354			11.93±0.37	11.9318	0.320039	0.37
50	1.4114	1.34207	1.37288	1.38371	1.43331	1.40178			15.63±0.36	15.6276	0.19135	0.36
IKZ01		IKZ02	IKZ03	IKZ04	IKZ05	IKZ06
D/A at Cursor 1	amplitude Positive Peak	amplitude Positive Peak	amplitude Positive Peak	amplitude Positive Peak	amplitude Positive Peak	amplitude Positive Peak			average±SD	average	P value
-40	-0.0683148	-0.0698759	-0.0887744	-0.297866	-0.0282889	-0.0672237			-1.16±1.09	-1.16169	0.459738	1.09
-30	-0.196304	-0.0984719	-0.279296	-0.18489	-0.201599	-0.0139134			-1.82±1.04	-1.82486	0.205442	1.04
-20	-0.260298	-0.167195	-0.311855	-0.216197	-0.291343	-0.117898			-2.56±0.84	-2.55578	0.35676	0.84
-10	-0.217365	-0.110233	-0.279296	-0.122958	-0.253625	-0.0661985			-1.97±0.97	-1.96568	0.436199	0.97
0	-0.120428	-0.0085327	-0.139648	-0.00975495	-0.201599	0.0437906			-0.82±1.07	-0.816802	0.370976	1.07
10	0.0221415	0.132141	0.0106835	0.122958	-0.0634062	0.16989			0.74±1.01	0.738591	0.34264	1.01
20	0.156341	0.27812	0.139648	0.278129	0.0754371	0.371121			2.43±1.24	2.4322	0.188492	1.24
30	0.403408	0.495819	0.387402	0.443056	0.341743	0.564591			4.94±0.9	4.93637	0.181978	0.9
40	0.644805	0.734504	0.656524	0.700088	0.556999	0.76509			7.6±0.83	7.59927	0.102056	0.83
50	0.953976	1.02323	0.893594	0.999542	0.963123	0.958706			10.85±0.5	10.8468	0.0175153	0.5
	1.32579	1.35093	1.21613	1.29854	1.419	1.20402			14.63±0.92	14.6337	0.0323766	0.92
IKD01		IKD02	IKD03	IKD04	IKD05	IKD06
OUT #0 at Cursor 1	amplitude Positive Peak	amplitude Positive Peak	amplitude Positive Peak	amplitude Positive Peak	amplitude Positive Peak	amplitude Positive Peak			average±SD	average	P value
-50	-0.156294	-0.0788184	-0.156688	-0.243622	-0.152465	-0.145897			-1.75±0.59	-1.74866	0.0160893	0.59
-40	-0.055493	-0.153154	-0.243362	-0.154723	-0.124664	-0.148758			-1.65±0.68	-1.64823	0.228116	0.68
-30	-0.203006	-0.230478	-0.263883	-0.255767	-0.205725	-0.316036			-2.76±0.48	-2.76198	0.231402	0.48
-20	-0.214069	-0.175567	-0.18228	-0.222005	-0.170316	-0.232322			-2.24±0.3	-2.24075	0.273645	0.3
-10	-0.100801	-0.108329	-0.0702562	-0.110031	-0.0904253	-0.110966			-1.11±0.18	-1.10638	0.208151	0.18
0	0.100801	0.0104593	0.0803962	0.0323049	0.0108276	0.101932			0.63±0.49	0.630564	0.265324	0.49
10	0.282382	0.131488	0.212217	0.210832	0.14749	0.297516			2.4±0.76	2.40061	0.146447	0.76
20	0.50892	0.351134	0.417191	0.378186	0.319854	0.4931			4.62±0.86	4.62244	0.101515	0.86
30	0.746521	0.604399	0.630374	0.668444	0.585277	0.697718			7.36±0.68	7.36467	0.0545459	0.68
40	1.0412	0.857664	0.865044	0.947286	0.906009	0.921307			10.37±0.75	10.3717	0.00684723	0.75
50	1.38065	1.27529	1.17094	1.24945	1.35287	1.12577			14.15±1.12	14.1479	0.0149437	1.12
