# Supplementary material for: Pseudo-ginsengenin DQ ameliorated aconitine-induced arrhythmias by influencing Ca2+ and K+ currents in ventricular myocytes
Source: RSC Adv. 2020 Jul 9;10(43):25999–6005. doi: 10.1039/d0ra01683g (PMC9055354; doi:10.1039/d0ra01683g)
Supplement: RA-010-D0RA01683G-s003 [file RA-010-D0RA01683G-s003.xlsx]

## Sheet: Fig-5
IK110000		IK120000	IK130000	IK140000	IK150000	IK160000
OUT #0 at Cursor 1	amplitude Negative Peak	amplitude Negative Peak	amplitude Negative Peak	amplitude Negative Peak	amplitude Negative Peak	amplitude Negative Peak			average±SD	average		SD
-100	-2.10671	-2.0189	-1.90301	-2.58743	-1.62465	-2.10482			-23.12±3.55	-23.119		3.55
-90	-1.64991	-1.53788	-1.432	-1.94695	-1.2154	-1.57204			-17.52±2.72	-17.5172		2.72
-80	-1.24119	-1.19629	-1.01948	-1.37074	-0.888856	-1.12278			-12.81±1.91	-12.8077		1.91
-70	-0.853371	-0.870601	-0.651507	-0.862055	-0.582092	-0.697216			-8.46±1.41	-8.45851		1.41
-60	-0.502906	-0.553537	-0.340447	-0.437779	-0.316482	-0.360941			-4.7±1.07	-4.70429		1.07
-50	-0.217056	-0.253602	-0.125388	-0.157929	-0.121972	-0.119157			-1.86±0.64	-1.86349		0.64
-40	0.0134374	0.0311765	0.0293869	-0.0046589	0.0111559	0.0251162			0.2±0.15	0.197779		0.15
-30	0.179572	0.134564	0.12684	0.0870978	0.0978252	0.114918			1.39±0.37	1.3873		0.37
-20	0.308289	0.196178	0.184917	0.134476	0.170215	0.167077			2.17±0.67	2.17444		0.67
-10	0.437197	0.250768	0.236315	0.152875	0.225648	0.206711			2.83±1.09	2.82681		1.09
0	0.556977	0.318235	0.299909	0.191726	0.285245	0.25264			3.57±1.41	3.56691		1.41
10	0.666212	0.401352	0.378255	0.240368	0.380443	0.318867			4.47±1.62	4.46722		1.62
20	0.784512	0.516199	0.486569	0.319727	0.475541	0.402502			5.59±1.77	5.58998		1.77
30	0.907313	0.639612	0.602781	0.402087	0.580655	0.51273			6.83±1.9	6.82618		1.9
IK110001		IK120001	IK130001	IK140001	IK150001	IK160001
OUT #0 at Cursor 1	amplitude Negative Peak	amplitude Negative Peak	amplitude Negative Peak	amplitude Negative Peak	amplitude Negative Peak	amplitude Negative Peak			average±SD	average	P value
-100	-2.10899	-1.87427	-1.89307	-2.51188	-1.54542	-2.00273			-22.35±3.58	-22.3527	0.717279	3.58
-90	-1.6528	-1.41147	-1.42568	-1.83782	-1.17683	-1.53632			-16.93±2.54	-16.9306	0.707842	2.54
-80	-1.18549	-1.01244	-1.02288	-1.24961	-0.843241	-1.12565			-12.06±1.63	-12.0586	0.482051	1.63
-70	-0.770517	-0.658143	-0.664687	-0.725805	-0.559174	-0.759971			-7.75±0.89	-7.74962	0.321675	0.89
-60	-0.417307	-0.356528	-0.360162	-0.336072	-0.324723	-0.436583			-4.18±0.51	-4.1786	0.302936	0.51
-50	-0.146539	-0.125382	-0.126582	-0.135609	-0.131021	-0.178777			-1.58±0.23	-1.58036	0.329945	0.23
-40	0.0394501	0.0339196	0.0343176	-0.0232276	-0.00415041	0.0273208			0.2±0.29	0.201554	0.97788	0.29
-30	0.206741	0.135278	0.136693	0.0410124	0.0844232	0.117351			1.35±0.63	1.35112	0.905289	0.63
-20	0.340461	0.205577	0.207812	0.0571874	0.149934	0.209643			2.19±1.04	2.19216	0.972711	1.04
-10	0.504565	0.254311	0.256804	0.06424	0.205257	0.270091			2.91±1.6	2.91249	0.915801	1.6
0	0.611017	0.300186	0.30337	0.0982765	0.260533	0.337568			3.58±1.87	3.57856	0.990519	1.87
10	0.706915	0.385585	0.389395	0.155464	0.337787	0.393554			4.44±2	4.43577	0.976683	2
20	0.815066	0.481509	0.486513	0.228826	0.417965	0.455347			5.4±2.13	5.40304	0.871981	2.13
30	0.947511	0.599284	0.605353	0.343201	0.517056	0.517079			6.61±2.25	6.60952	0.860394	2.25
												#DIV/0!
IK110002		IK120002	IK130002	IK140002	IK150002	IK160002						0
OUT #0 at Cursor 1	amplitude Negative Peak	amplitude Negative Peak	amplitude Negative Peak	amplitude Negative Peak	amplitude Negative Peak	amplitude Negative Peak			average±SD	average	P value	0
-100	-1.91855	-1.69959	-1.81606	-2.399	-1.31342	-1.82967			-20.55±3.94	-20.5549	0.26367	3.94
-90	-1.54387	-1.27712	-1.36469	-1.87253	-0.994638	-1.38363			-15.8±3.27	-15.7986	0.346232	3.27
-80	-1.0496	-0.899669	-0.961152	-1.32036	-0.730567	-1.00191			-11.17±2.18	-11.1671	0.196263	2.18
-70	-0.670534	-0.564491	-0.603006	-0.907877	-0.450622	-0.655938			-7.21±1.71	-7.21436	0.198854	1.71
-60	-0.31021	-0.286784	-0.306436	-0.539761	-0.226393	-0.384003			-3.85±1.23	-3.84567	0.225737	1.23
-50	-0.103479	-0.105554	-0.112842	-0.211013	-0.0681023	-0.170867			-1.45±0.59	-1.44543	0.264923	0.59
-40	0.084053	0.0376051	0.0436736	-0.0466388	0.0180778	-0.0183151			0.22±0.52	0.221827	0.916265	0.52
-30	0.319809	0.126042	0.141496	0.100549	0.136044	0.109221			1.75±0.92	1.74749	0.394459	0.92
-20	0.502579	0.201667	0.225684	0.168487	0.192763	0.184435			2.76±1.43	2.76332	0.382648	1.43
-10	0.675372	0.257011	0.288312	0.18751	0.235893	0.253508			3.55±2.01	3.55357	0.454561	2.01
0	0.767664	0.323248	0.362303	0.170911	0.284635	0.3199			4.17±2.3	4.17352	0.594053	2.3
10	0.88558	0.399651	0.447876	0.182369	0.333377	0.408461			4.98±2.65	4.97624	0.696771	2.65
20	1.02126	0.483524	0.540655	0.302822	0.396949	0.487249			6.05±2.82	6.05329	0.740038	2.82
30	1.14711	0.531658	0.633545	0.381043	0.45479	0.570002			6.96±3.07	6.96282	0.927918	3.07
												#DIV/0!
IK110003		IK120003	IK130003	IK140003	IK150003	IK160003						0
OUT #0 at Cursor 1	amplitude Negative Peak	amplitude Negative Peak	amplitude Negative Peak	amplitude Negative Peak	amplitude Negative Peak	amplitude Negative Peak			average±SD	average	P value	0
-100	-1.83159	-1.68033	-1.5841	-2.20906	-1.5054	-1.71423			-19.71±2.8	-19.7092	0.0943518	2.8
-90	-1.42062	-1.27849	-1.18376	-1.64316	-1.13538	-1.29116			-14.89±2.07	-14.8925	0.0895143	2.07
-80	-1.04893	-0.927524	-0.830412	-1.1831	-0.813872	-0.941633			-10.76±1.57	-10.7593	0.0696888	1.57
-70	-0.732467	-0.603888	-0.51656	-0.790669	-0.528523	-0.611206			-7.08±1.24	-7.08486	0.102638	1.24
-60	-0.36168	-0.3342	-0.248684	-0.461605	-0.284017	-0.349313			-3.82±0.82	-3.81929	0.139927	0.82
-50	-0.14586	-0.133024	-0.0744987	-0.20569	-0.112697	-0.146694			-1.53±0.49	-1.5327	0.336673	0.49
-40	0.0496752	0.00635888	0.0160987	-0.0324951	0.0712109	-0.00816128			0.19±0.43	0.192298	0.976955	0.43
-30	0.257743	0.095537	0.136718	0.0922267	0.156434	0.100446			1.57±0.71	1.57136	0.585147	0.71
-20	0.440036	0.150459	0.216631	0.176633	0.239085	0.177455			2.62±1.19	2.62228	0.441578	1.19
-10	0.611089	0.196715	0.271696	0.224971	0.31025	0.247402			3.49±1.71	3.48712	0.444105	1.71
0	0.782013	0.250663	0.331159	0.271152	0.391936	0.314994			4.39±2.23	4.38561	0.464224	2.23
10	0.867928	0.32661	0.410202	0.344232	0.4784	0.389649			5.28±2.27	5.27532	0.494441	2.27
20	0.957201	0.419071	0.507471	0.438616	0.572444	0.466658			6.29±2.27	6.29487	0.561838	2.27
30	1.0676	0.525838	0.596087	0.540753	0.675125	0.558995			7.42±2.32	7.42397	0.635662	2.32
												#DIV/0!
